# Supplementary material
Source: publisher figshare collection journal article supplement (https://tandf.figshare.com/articles/dataset/_/5951038)
Supplement: Supplementary file 1 [file 2]

A  $E\flat+$   $G$   $G$   $Cm$  B  $A\flat$   
 I in-sist -ed on his still hand -ing some rest. I felt dazed as  
 6  $Fm$   $G$   $Cm$  C  $E\flat+$   $G$   $G$   
 though I had re-ceived a blow on the head. I could only guess at what  
 12  $Cm$  A  $E\flat+$   $G$   $G$   $Cm$   
 had hap-pened. I asked him if he had seen or heard any -thing.
