# Supplementary material
Source: publisher figshare collection journal article supplement (https://tandf.figshare.com/articles/dataset/_/5951038)
Supplement: Supplementary file 2 [file 2]

A Bm G A D B D  
 I seemed now to see the win -dow through a fog. I held my

6 G A D A Bm G A  
 head with two hands and tried to me -mo -rice. I went clo -ser to the win -dow and held

12 D A Bm G A D  
 the light high -er. I re -call pulling through mi -nutes that lagged odd -ly.
