# Supplementary material
Source: publisher figshare collection journal article supplement (https://tandf.figshare.com/articles/dataset/_/5951038)
Supplement: Supplementary file 3 [file 2]

A
C
F
G
C
A
C

I held my head with both hands and tried to re-mem-ber. I agreed

B
F
G
C
C
F

to this and soon we were both asleep. I walked qui-et-ly and seemed hes-i

B
G
C
C
F
G
C

-tant-ly about as I went. I spoke to him and bade him lie still.
