# Supplementary material
Source: publisher figshare collection journal article supplement (https://tandf.figshare.com/articles/dataset/_/5951038)
Supplement: Supplementary file 4 [file 2]

A Em Am B Em B G+  
 I held my head with two hands and tried to re-mem-ber. I said

6 A B B Em Em Am B  
 who -ever would have thought of this. I felt stunned as though I had ta -ken a

12 A Em Em Am B Em  
 blow on the head. I was hard -ly con -scious of evening so short was it.
