# Supplementary material
Source: publisher figshare collection journal article supplement (https://tandf.figshare.com/articles/dataset/_/5951038)
Supplement: Supplementary file 5 [file 2]

A G#m B B E B G#m  
 I had to make sure that all the doors were fas -tened. I had to  
 6 B B E B G#m B B  
 make sure that all the doors were fas -tened. I took a rug from a chair near by  
 12 E A G#m B B E  
 and spread it over her. I had to make sure that all the doors were fas -tened.
