# Supplementary material
Source: publisher figshare collection journal article supplement (https://tandf.figshare.com/articles/dataset/_/5951038)
Supplement: Supplementary file 6 [file 2]

[A] C#m E E A [B] A D

I spoke to him and bade him lie still. I was scarce-ly con-sci-ous of evening

E A C#m E E A

so brief was it. I was scarce-ly con-sci-ous of evening so brief was it.

[A] C#m E E A

I won-dered vague-ly how I had man-aged to dis-lodge it.
