# Supplementary material
Source: publisher figshare collection journal article supplement (https://tandf.figshare.com/articles/dataset/_/5951038)
Supplement: Supplementary file 7 [file 2]

A C#m E E A A C#m E  
 I spoke to him and bade him lie still. I won-dered vague-ly how I

7 E A B A D E  
 had man-aged to dis-lodge it. I walked qui-et-ly and looked cau-tious-ly about

12 B A A D E A  
 as I went. I put my hand through the bro-ken win-dow and shook the bar.
